# Supplementary material for: Telemedicine Technologies for Diabetes in Pregnancy: A Systematic Review and Meta-Analysis
Source: PubMed Central journal article supplement (PMC5121530; doi:10.2196/jmir.6556), 2016-11-09
Supplement: jmir_v18i11e290_app1.pdf [file jmir_v18i11e290_app1.pdf]

Table 2. Study characteristics.

| Study<br>(Year)            | Area   | Randomization<br>method           | Type of<br>Diabetes<br>Mellitus | Number of<br>subjects<br>(I:C) | Technology assessed<br>(intervention)                                                                                                                                                                         | Comparison<br>group                      | Clinical parameters |       |          |          | Satisfaction |
|----------------------------|--------|-----------------------------------|---------------------------------|--------------------------------|---------------------------------------------------------------------------------------------------------------------------------------------------------------------------------------------------------------|------------------------------------------|---------------------|-------|----------|----------|--------------|
|                            |        |                                   |                                 |                                |                                                                                                                                                                                                               |                                          | Glucose<br>level    | HbA1c | Maternal | Neonatal |              |
| Fallucca<br>(1996)<br>[15] | Italy  | Stratified block<br>randomization | Type 1                          | 19<br>(9:10)                   | <i>Modem</i> transmission of BG <sup>c</sup> control<br>with physician advice. Clinic visit<br>every 2-4 weeks                                                                                                | Routine care,<br>weekly visits           |                     |       | ✓        |          |              |
| Wojcicki<br>(2001)<br>[31] | Poland | not described                     | Type 1                          | 32<br>(17:15)                  | Transmission of stored BG results<br>and information about insulin, diet<br>over <i>modem</i> to a central hospital<br>computer, with diabetologist review<br>and phone call is needed to the<br>patient.     | Routine care,<br>visits every 3<br>weeks | ✓                   | ✓     | ✓        |          |              |
| Homko<br>(2007)<br>[29]    | USA    | not described                     | GDM <sup>a</sup>                | 63<br>(34:29)                  | Provision of computers and<br>connection to a <i>website</i> to document<br>glucose values, transmit them at least<br>3 times per week, and promote<br>communication between the patient<br>and diabetes team | Routine care,<br>Trial log<br>books      | ✓                   | ✓     | ✓        | ✓        |              |
| Dalfra                     | Italy  | sequential                        | Type 1                          | 32                             | Transmission of BG results via an                                                                                                                                                                             | Routine care,                            |                     | ✓     | ✓        | ✓        |              |

|                                  |       |                                         |                  |                 |                                                                                                                                                                                                                                                            |                                           |   |   |   |   |  |
|----------------------------------|-------|-----------------------------------------|------------------|-----------------|------------------------------------------------------------------------------------------------------------------------------------------------------------------------------------------------------------------------------------------------------------|-------------------------------------------|---|---|---|---|--|
| (Type 1;<br>2009)<br>[21]        |       | allocation                              |                  | (17:15)         | audio tone transmitted down normal <i>telephone receiver</i> . Physicians reviewed the results and transferred messages via the same system with SMS alerts when a new message was available. Clinic visits once a month                                   | fortnightly visits                        |   |   |   |   |  |
| Dalfrà<br>(GDM;<br>2009)<br>[21] | Italy | sequential allocation                   | GDM <sup>a</sup> | 203<br>(88:115) | Transmission of BG results via an audio tone transmitted down normal <i>telephone receiver</i> . Physicians reviewed the results and transferred messages via the same system with SMS alerts when a new message was available. Clinic visits once a month | Routine care, fortnightly visits          |   | ✓ | ✓ | ✓ |  |
| Perez-Ferre<br>(2010)<br>[30]    | Spain | not stated                              | GDM <sup>a</sup> | 100<br>(50:50)  | <i>Cellular phone transmission</i> of BG results via SMS sent once a week. Results reviewed on a web based program by health professionals and text messages sent.                                                                                         | Routine care, monthly visits              |   | ✓ | ✓ | ✓ |  |
| Homko<br>(2012)<br>[28]          | USA   | adequate allocation concealment methods | GDM <sup>a</sup> | 80<br>(40:40)   | <i>Internet and telephone transmission</i> of BG data and messages from patients. Nurses check the results and send text messages to patients. At                                                                                                          | Routine care, trial log book, fortnightly | ✓ |   | ✓ | ✓ |  |

|                         |         |                                                             |                  |                   |                                                                                                                                                                                                                                                                              |                                                |  |   |   |   |   |
|-------------------------|---------|-------------------------------------------------------------|------------------|-------------------|------------------------------------------------------------------------------------------------------------------------------------------------------------------------------------------------------------------------------------------------------------------------------|------------------------------------------------|--|---|---|---|---|
|                         |         |                                                             |                  |                   | least weekly transmission.                                                                                                                                                                                                                                                   | visits                                         |  |   |   |   |   |
| Given<br>(2015)<br>[27] | Ireland | Stratified block,<br>computer<br>generated<br>randomization | GDM <sup>b</sup> | 50<br><br>(24:26) | Weekly review using telemedicine.<br><br>Use of a <i>telemedicine hub installed in the patient's home</i> that would send the last 7 days of readings to a central server where accessed by a health care provider. The staff contacted the patients if changes were needed. | Routine care,<br><br>fortnightly<br><br>visits |  | ✓ | ✓ | ✓ | ✓ |

<sup>a</sup>Carpenter and Coustan guideline.

<sup>b</sup>NICE 2008 guideline.

<sup>c</sup>BG: blood glucose.
